# Supplementary material
Source: ML conference proceedings conference paper supplement (https://openreview.net/forum?id=nUBSQKeROV)

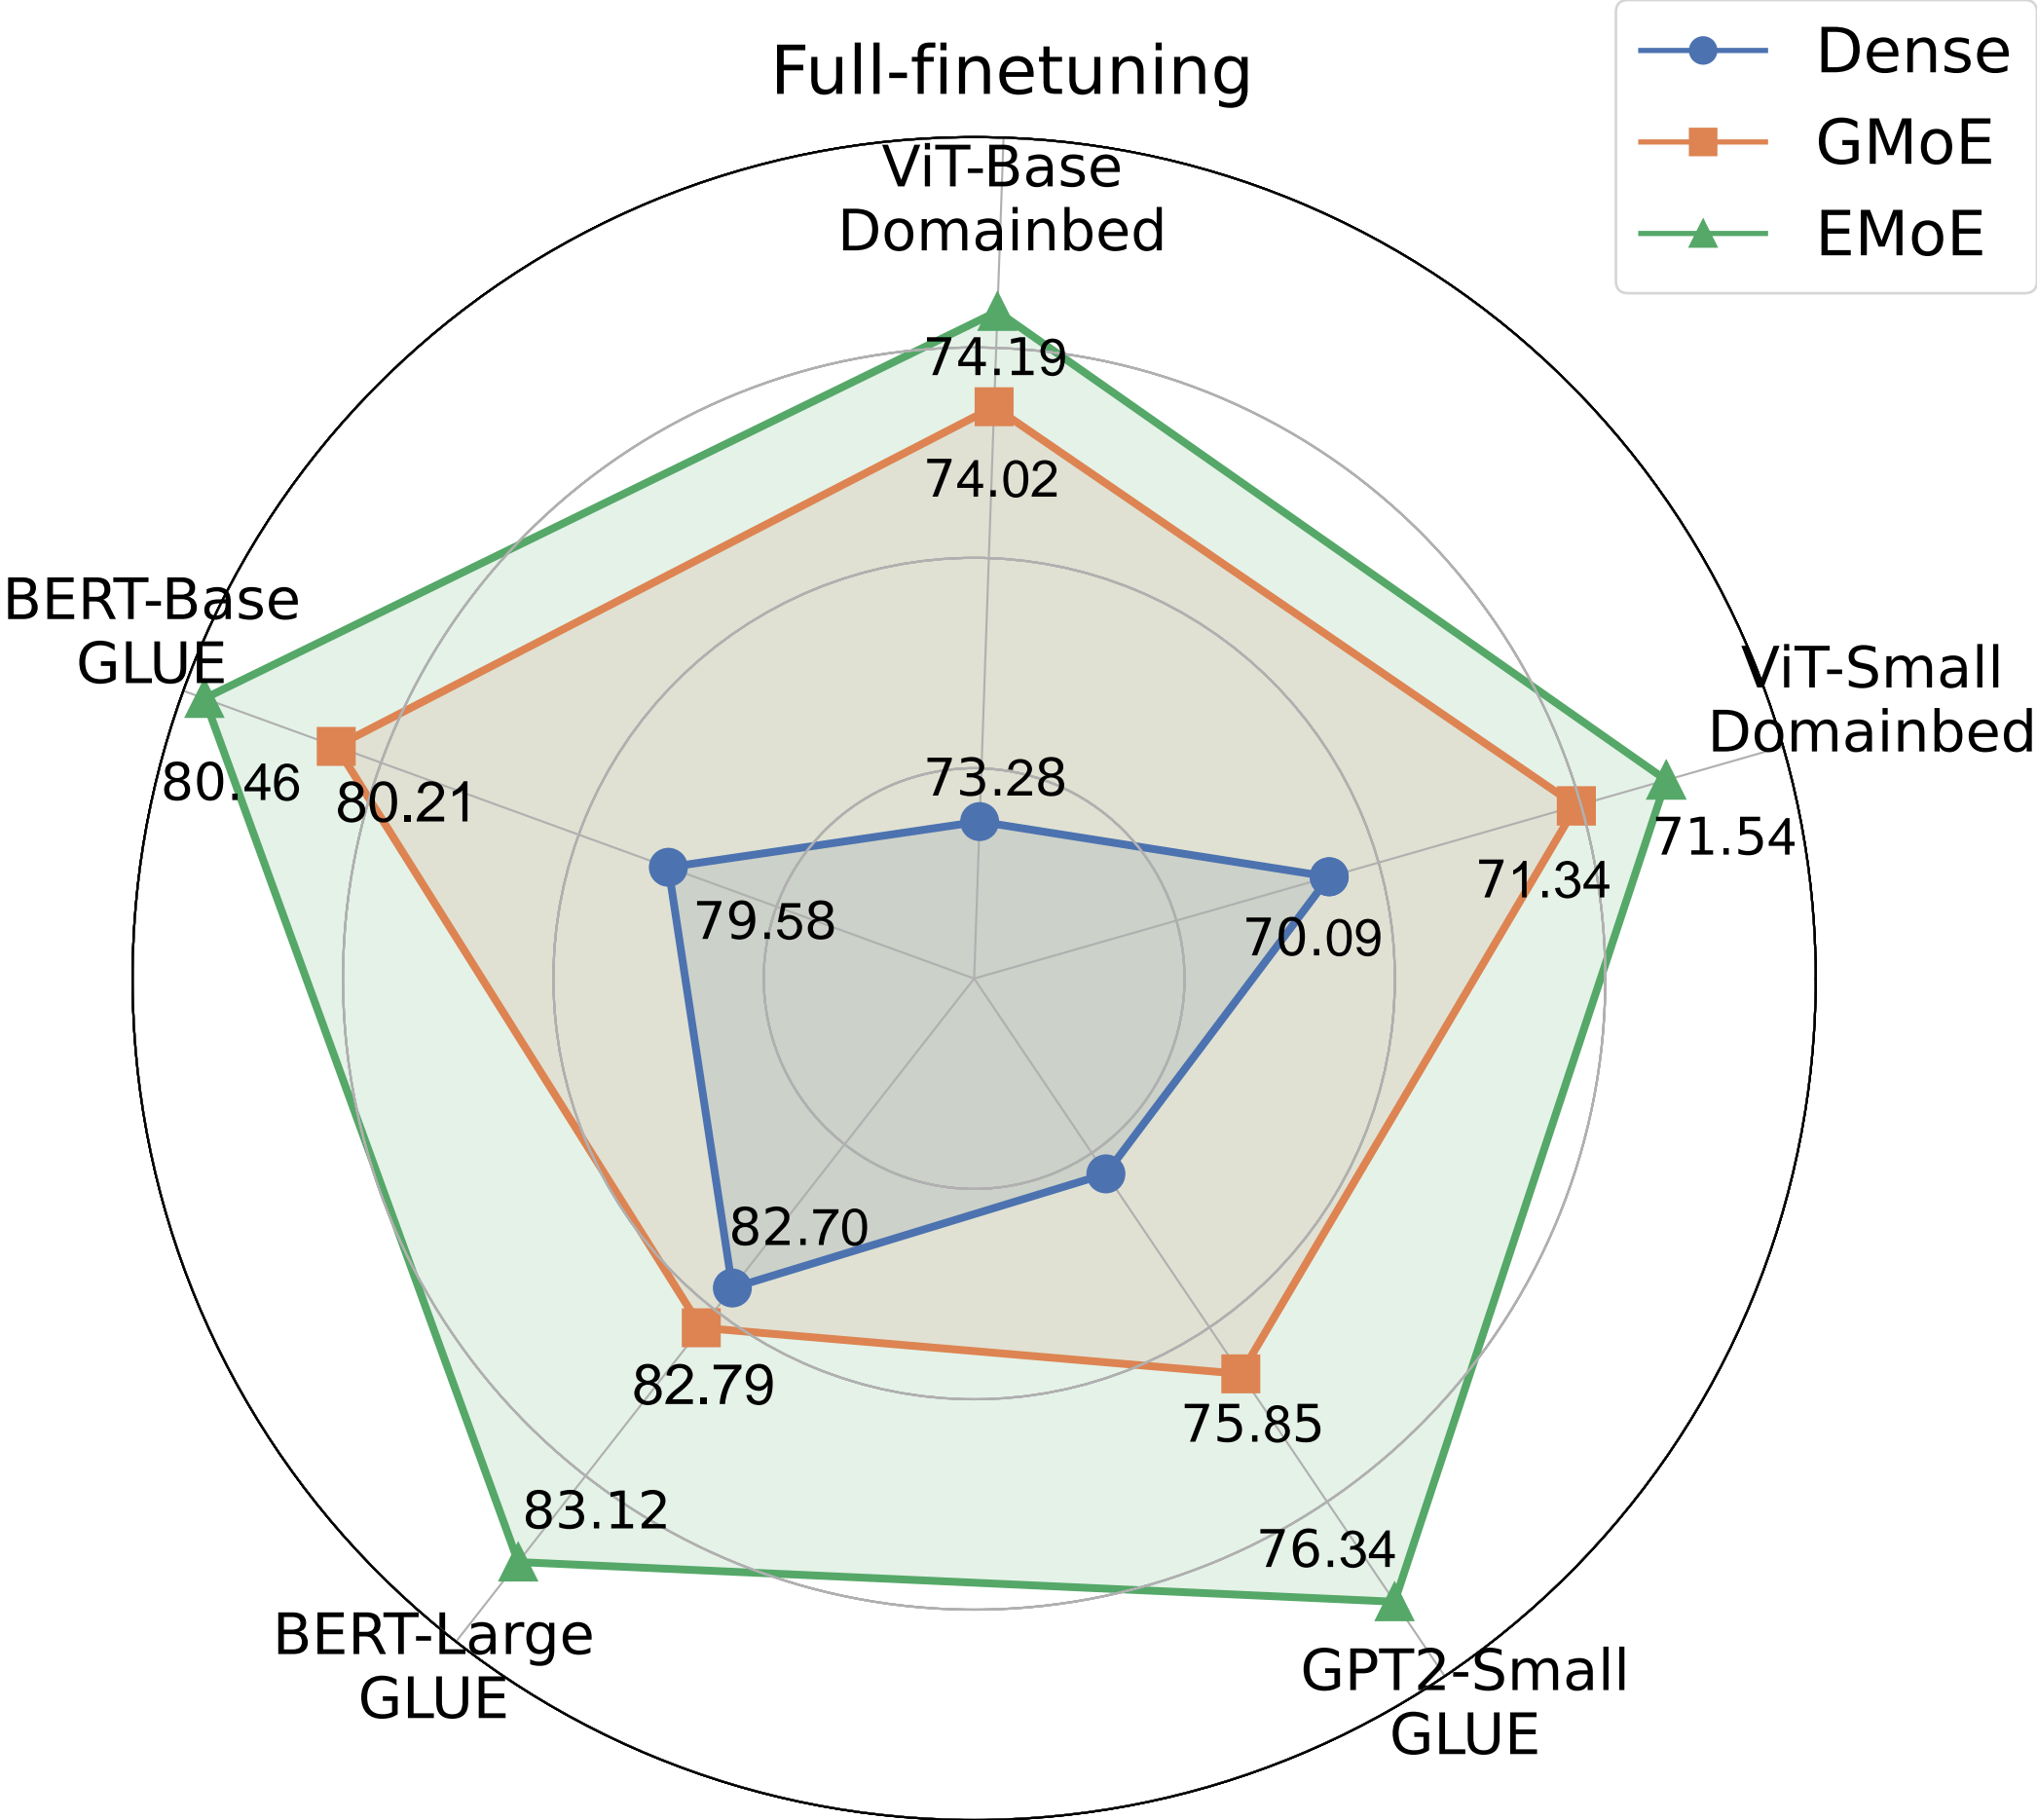

Supplement: supplementary_material [file attachment]

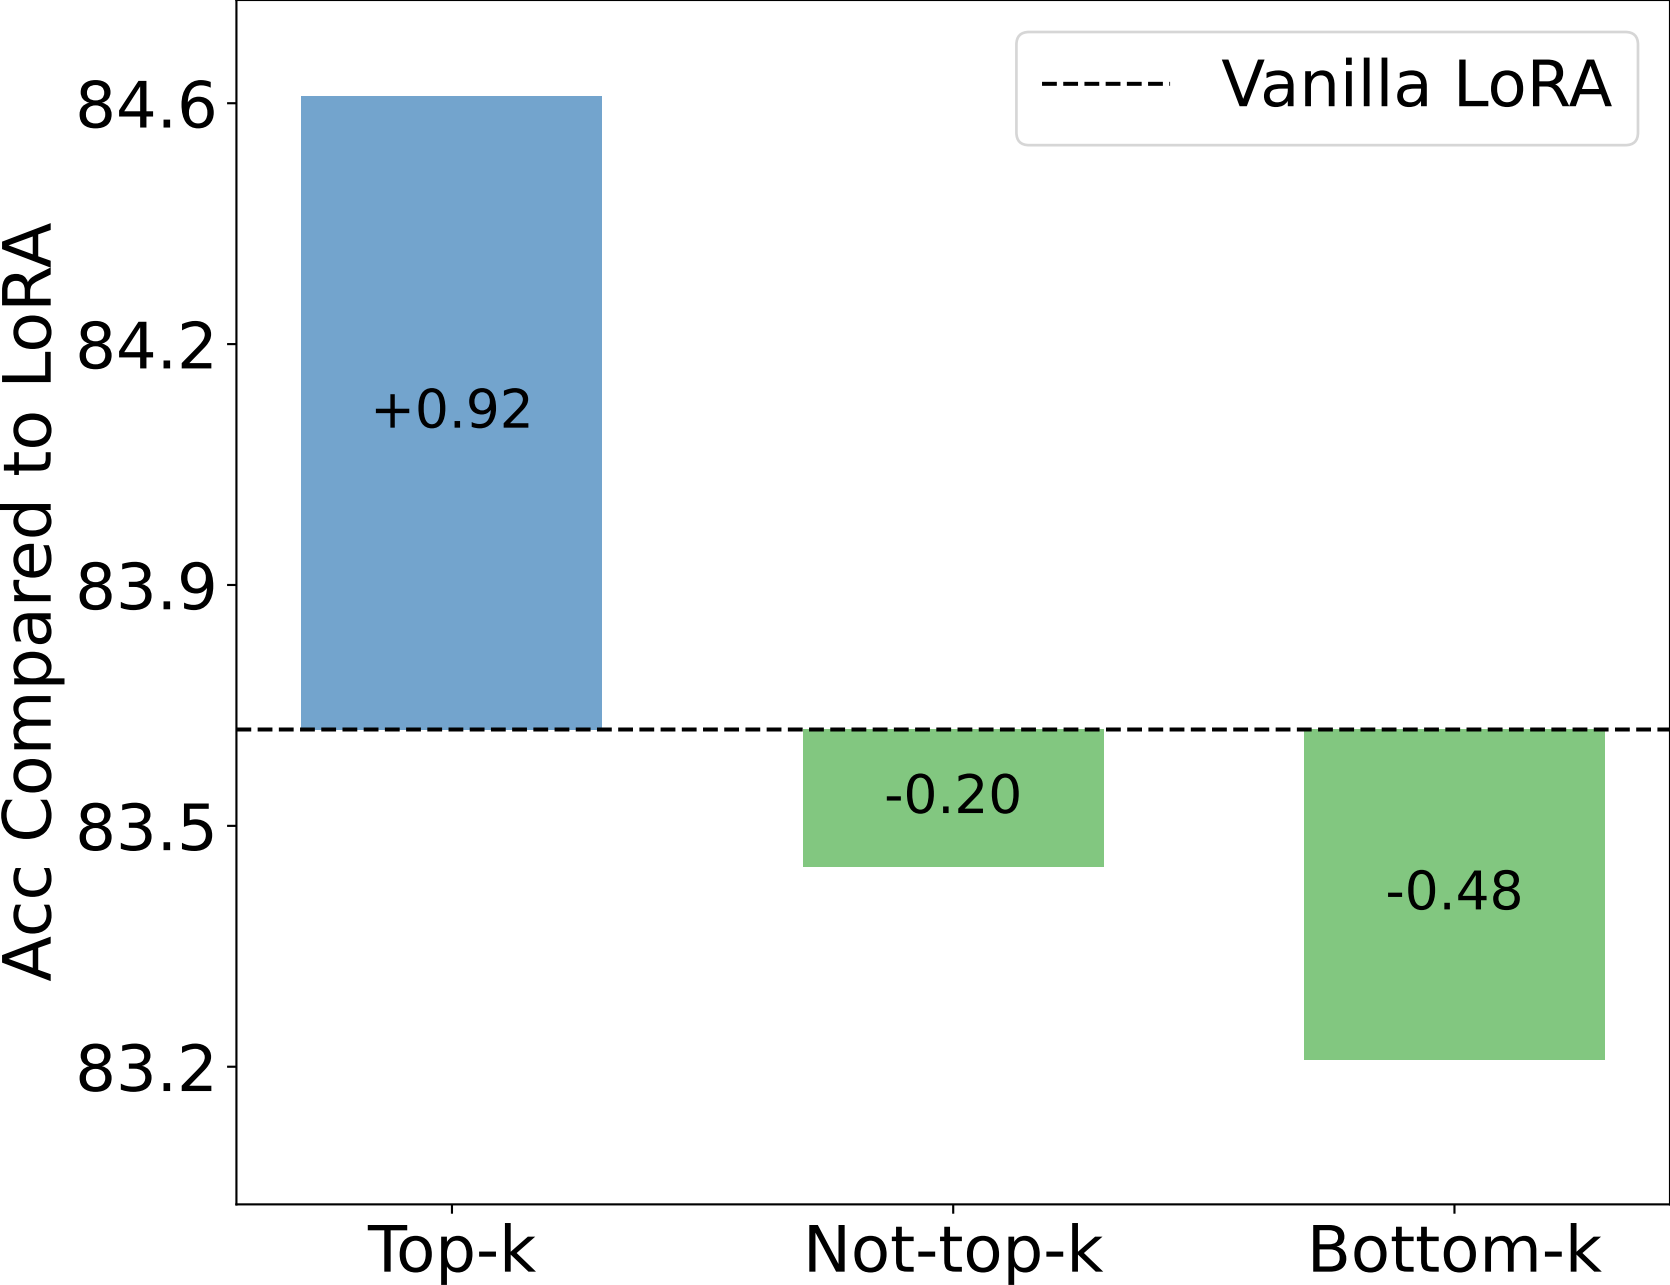

Supplement: supplementary_material [file attachment]

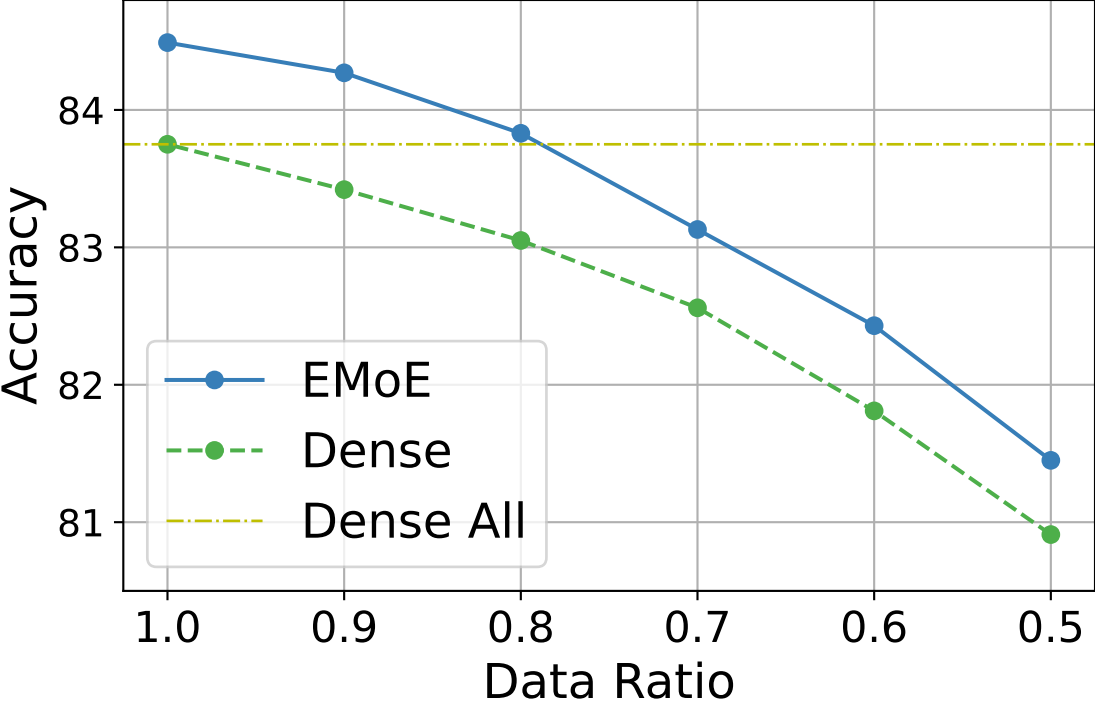

Supplement: supplementary_material [file attachment]

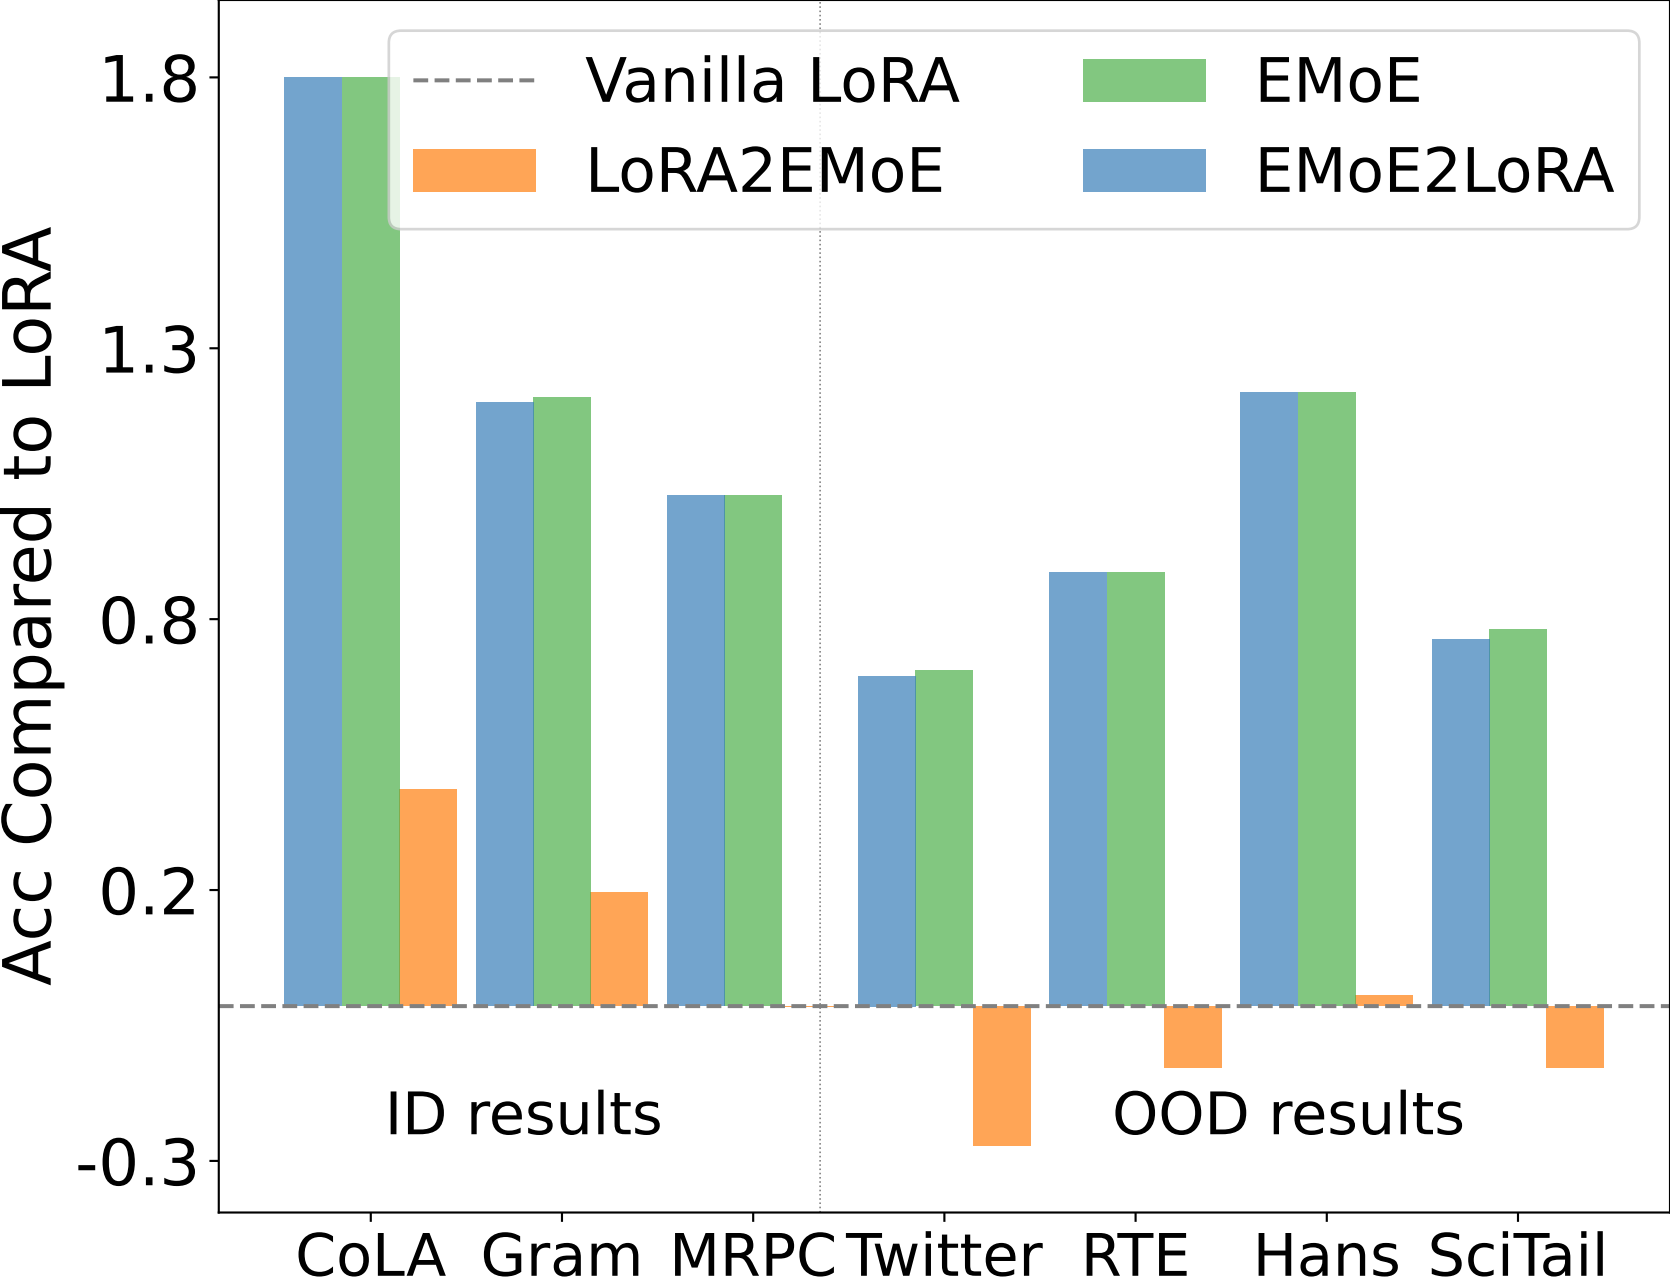

Supplement: supplementary_material [file attachment]

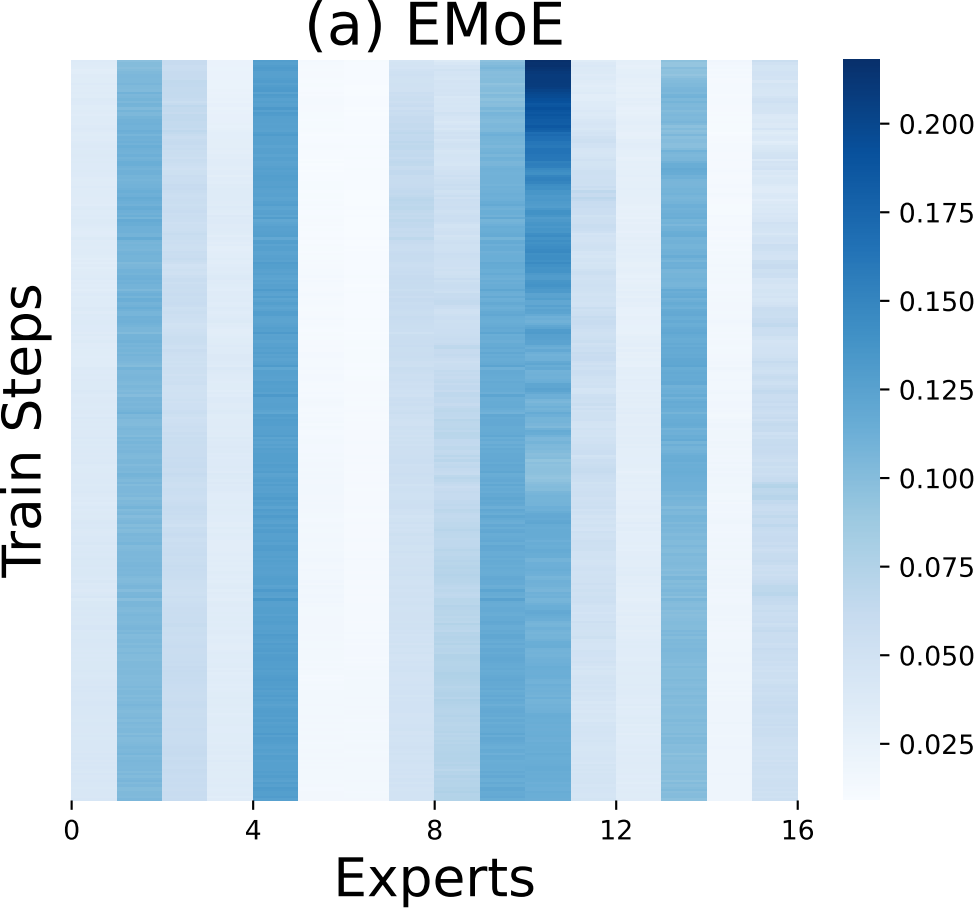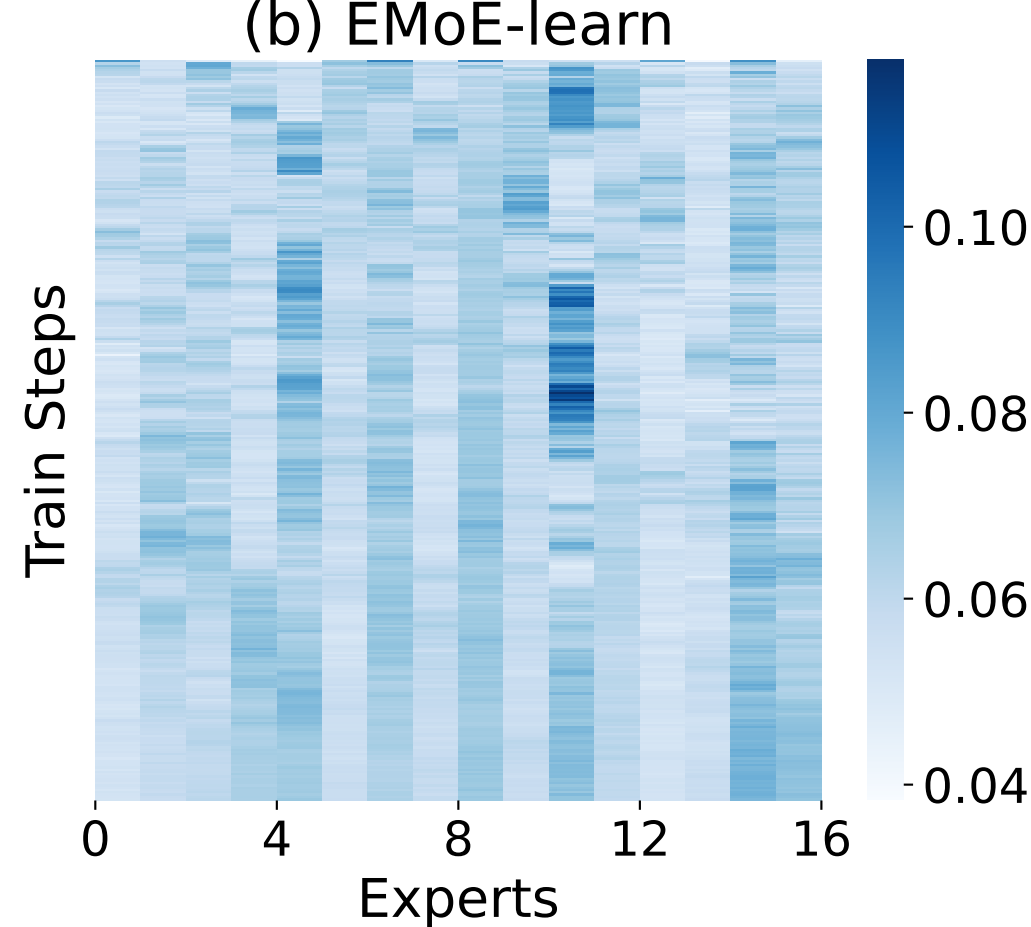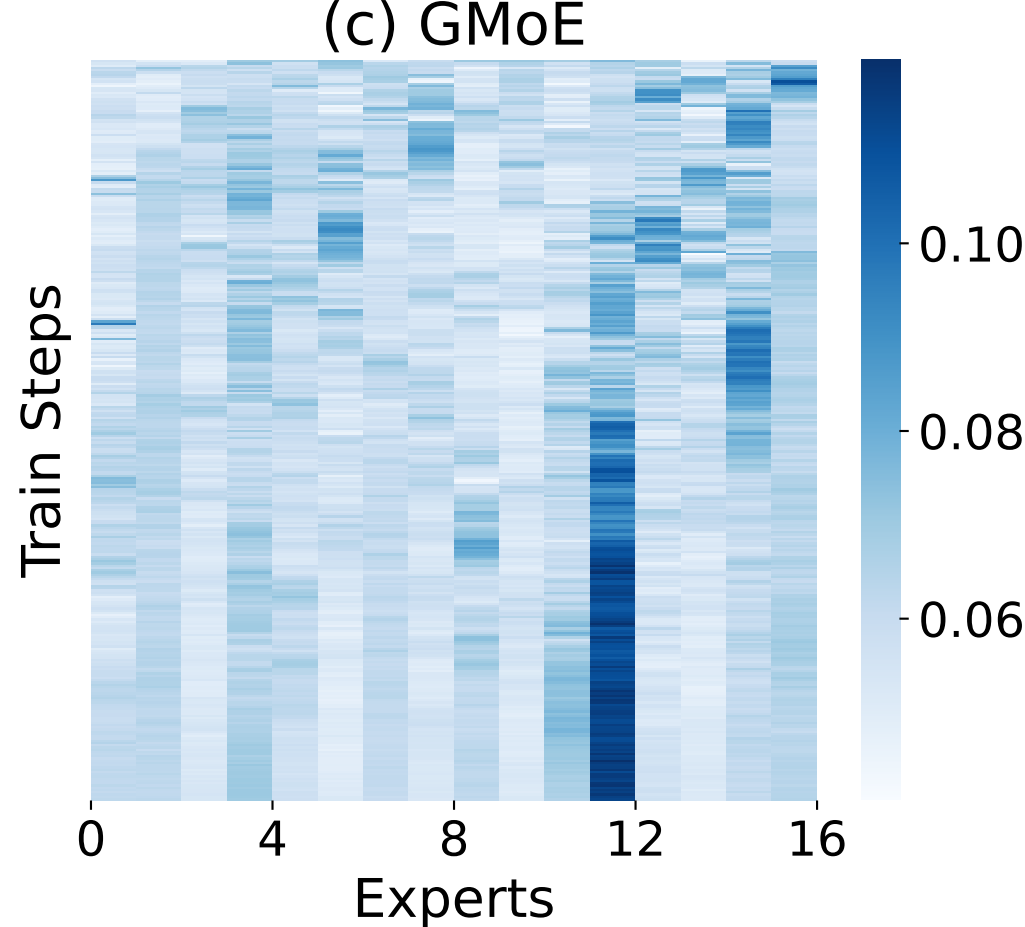

Supplement: supplementary_material [file attachment]

# Raw Data Activation Patterns

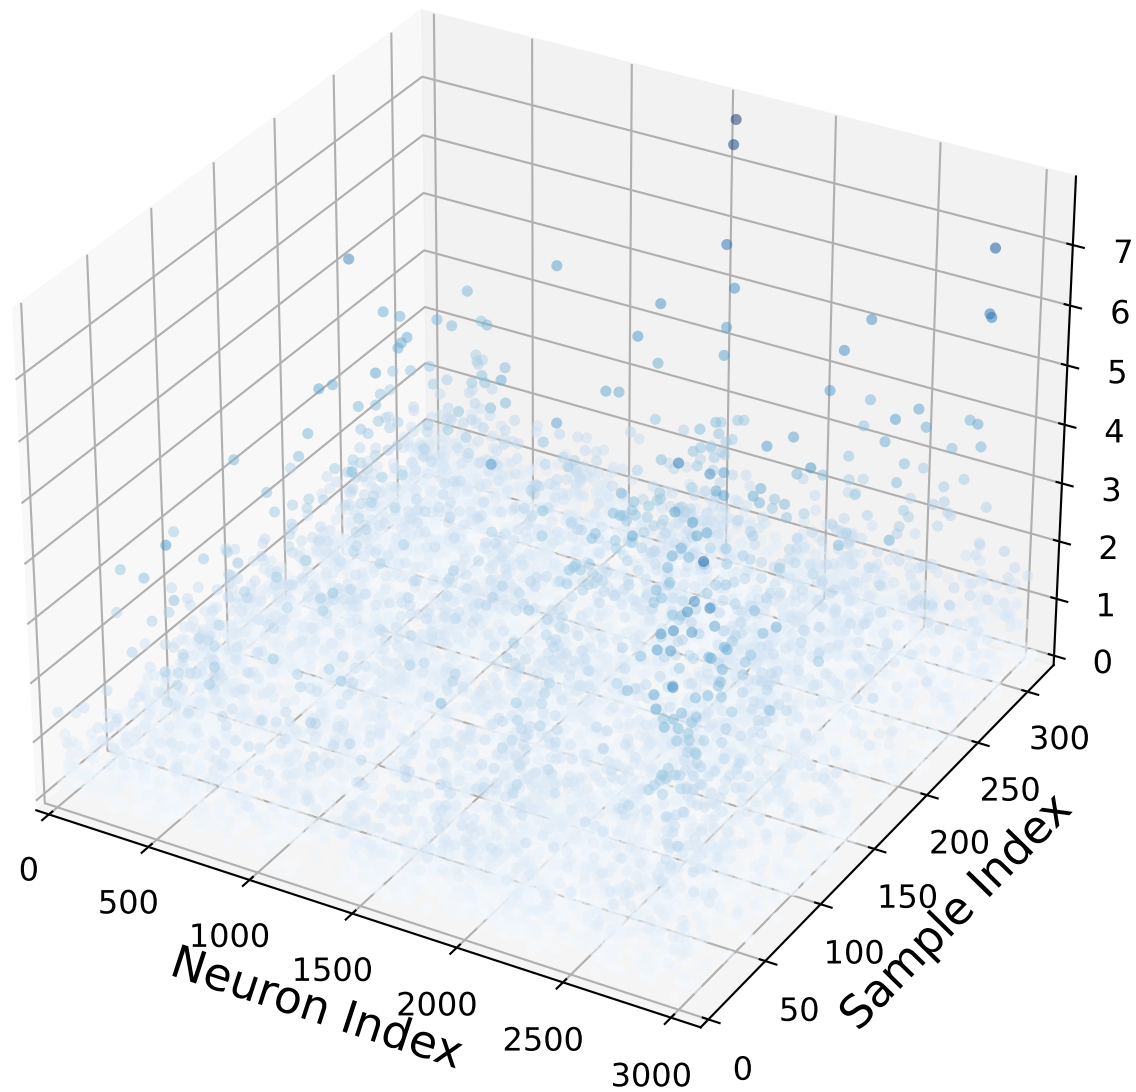

# Weight-Clustered Activation Patterns

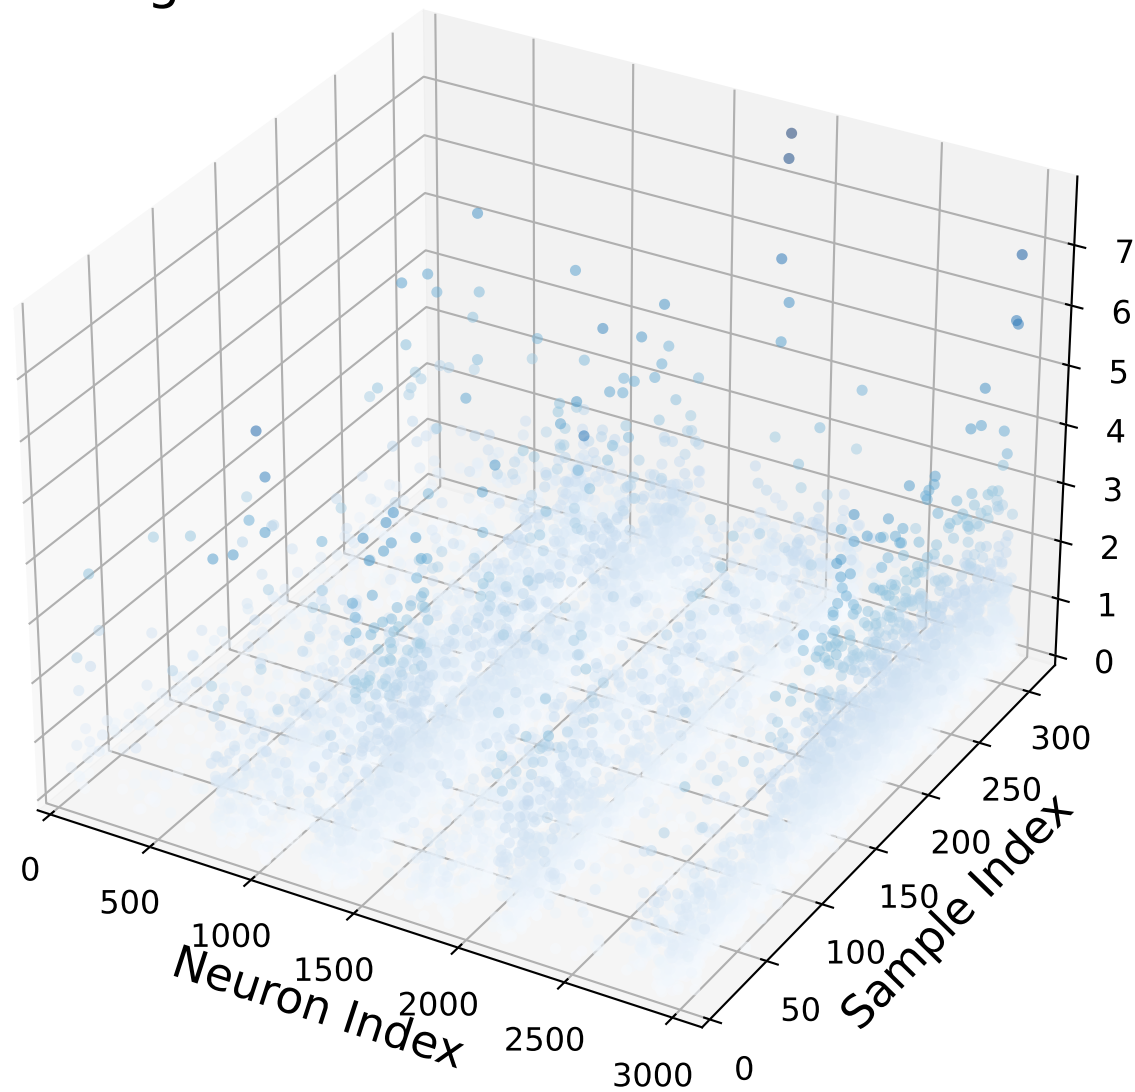

Supplement: supplementary_material [file attachment]

# LoRA-tuning

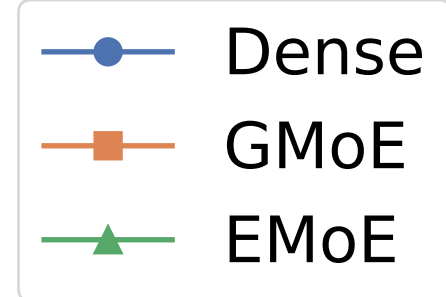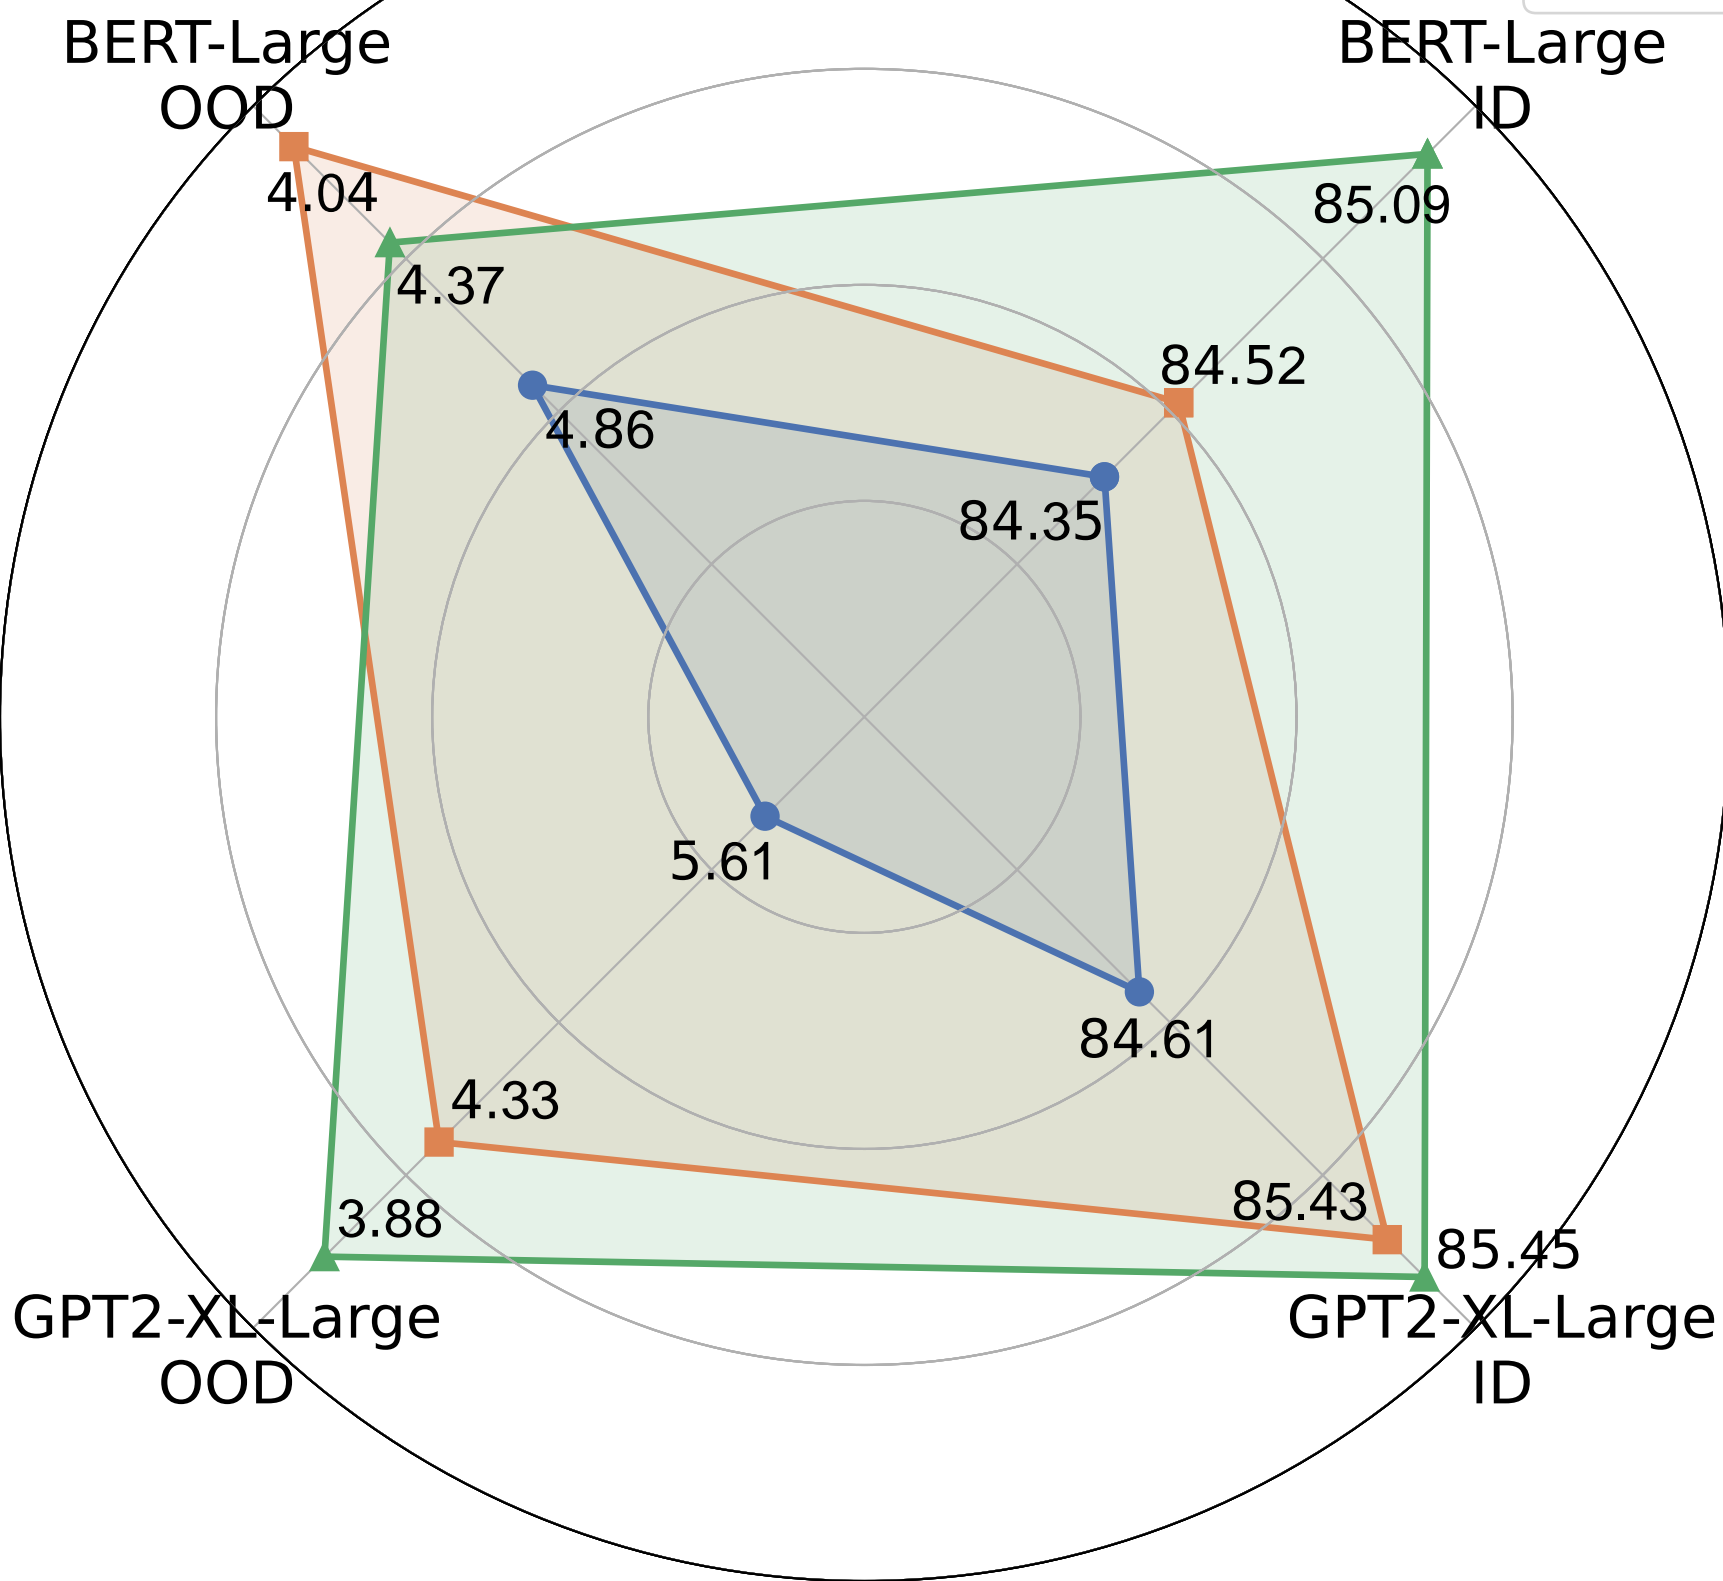

Supplement: supplementary_material [file attachment]

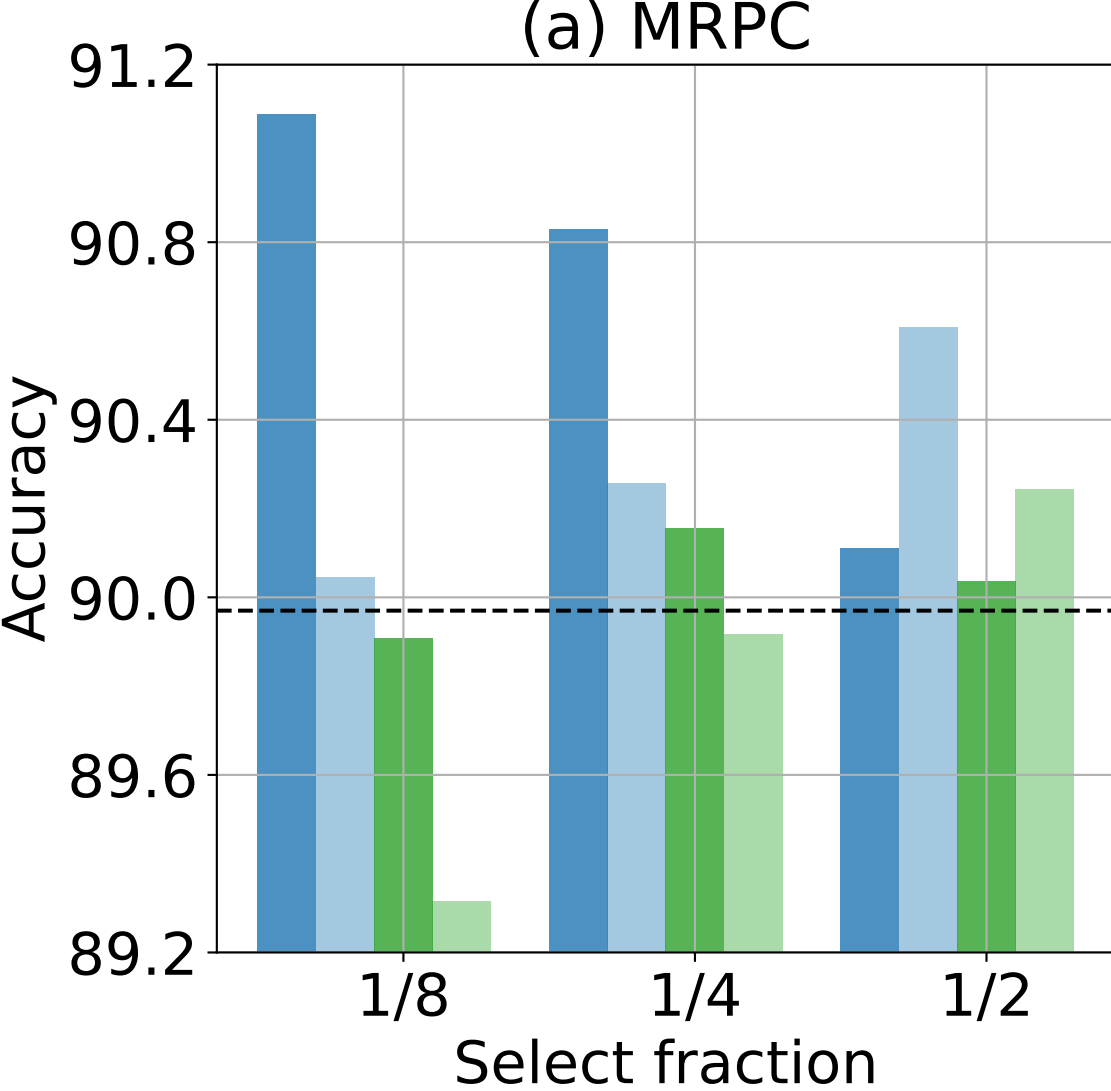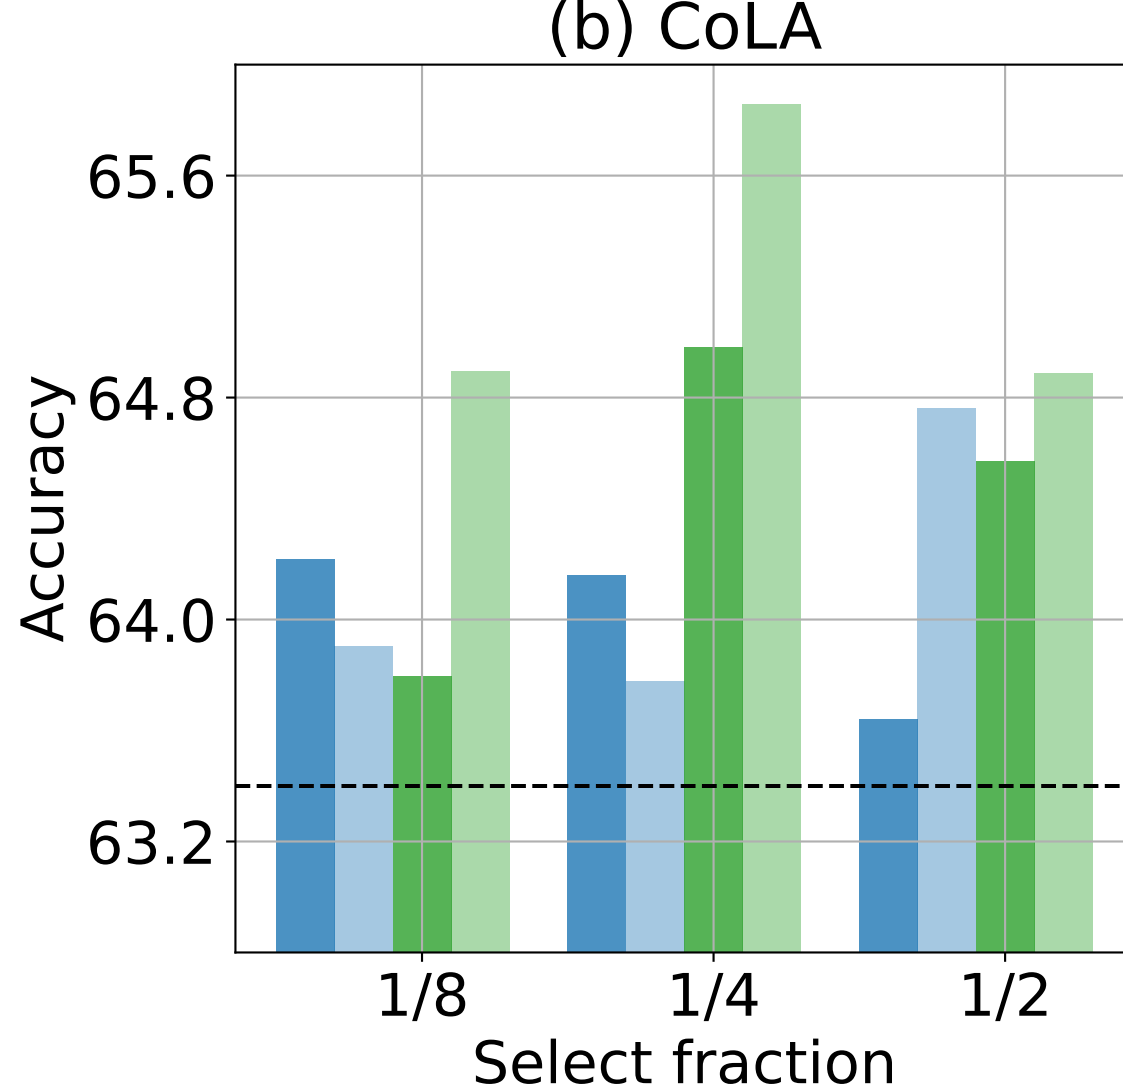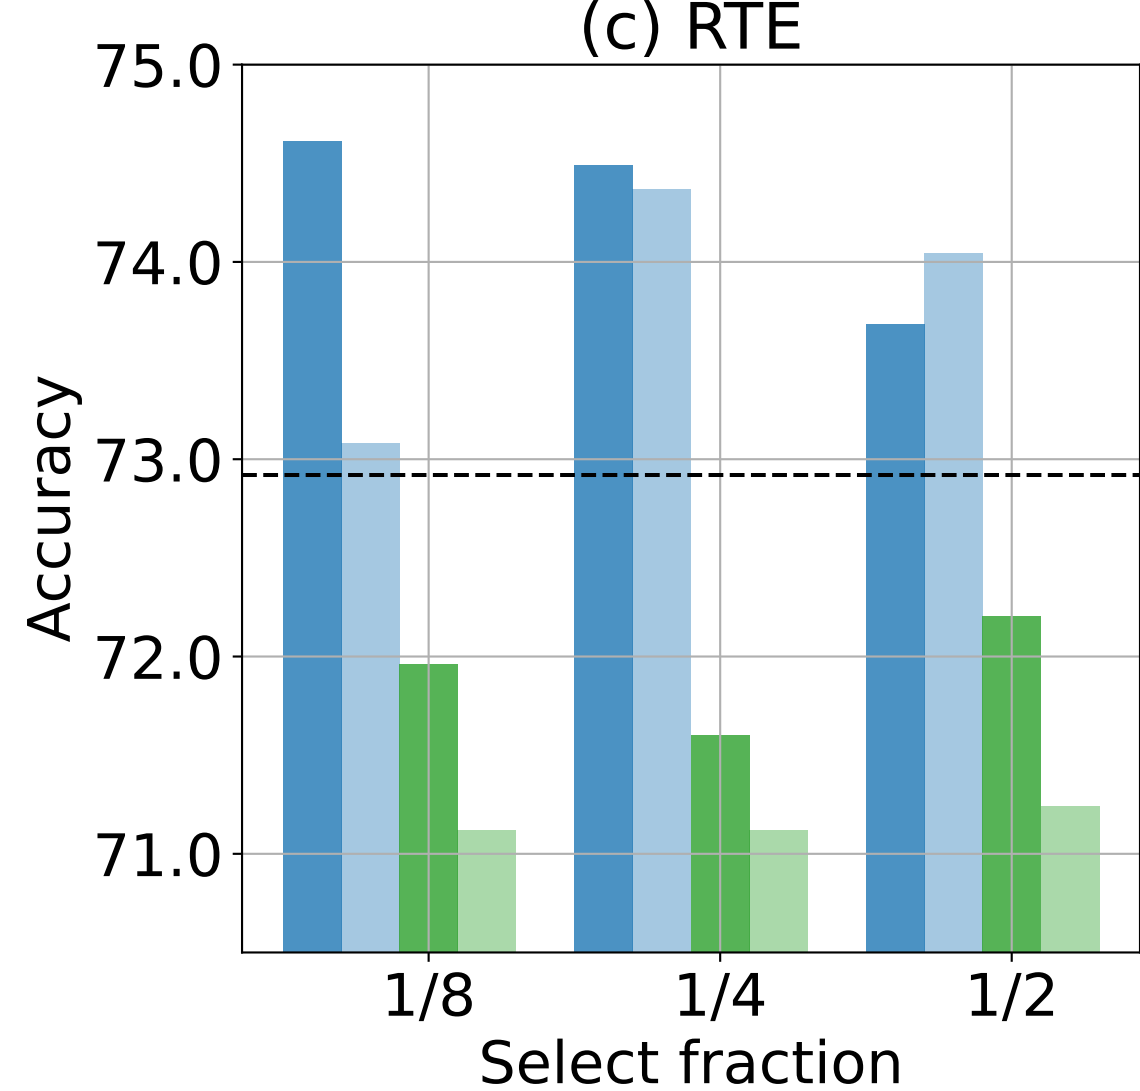

----- dense    EMoE (e=16)    EMoE (e=32)    EMoE-learn (e=16)    EMoE-learn (e=32)

Supplement: supplementary_material [file attachment]
